# Supplementary material for: Assessment of the pulmonary toxic potential of nano-tobacco stem-pyrolyzed biochars
Source: Royal Society of Chemistry journal article supplement (doi:10.1039/c8en00968f), 2019-01-01
Supplement: c8en00968f1.pdf [file c8en00968f1.pdf]

## Supplementary Material

### S1. The determination of metal content of nTSBs using inductively coupled plasma mass spectrometry (ICP-MS) assay

ICP-MS (Elan6100; PerkinElmer, Shelton, CT, USA) was used to determine the concentrations of metals in nTSB. Briefly, the nTSB (n=6) were liquefied with 0.5 ml nitric acid and subjected to microwave digestion (Anton Paar GmbH, Graz, Austria). The microwave digestion temperature was programmed to increase from 30 to 75 °C at a rate of 7.5 °C/min with a 1 min hold at 75 °C and up to 130 °C at a rate of 11 °C/min with a hold of 30 min at 130 °C. The digested solution was diluted with deionized water. This sample solution was then directly analyzed by ICP-MS.

### S2 Collection of nTSBs

It has been demonstrated that nanoparticles often form agglomerates (<500 nm) in air during production. In the present work, the airborne nTSBs (<500 nm) from our manufacturing location of nTSBs were collected on Zefluor after-filter (Pall Life Sciences, 1.0 μm pore) using a micro-orifice uniform deposited impactor (MOUDI) (MSP Corporation, MN, USA). The sampling flow rate for the MOUDI was 30 L/min. For each sample, the collected air volume approximated 43.2 m<sup>3</sup>/day. Before and after each sampling, the filters were equilibrated in a dust-free desiccator (RH=60%; temperature=25°C) for 24h. The daily mean nTSBs (<500 nm) concentration was 171.75 ± 21.45 μg/m<sup>3</sup> (147.48–188.16 μg/m<sup>3</sup>) during the sampling period.

### S3 Calculation of the daily nTSBs alveolar deposition dose

The human daily nTSBs alveolar deposition dose was calculated using the following equation:

*Human alveolar deposition dose* =

*nTSBs aerosol concentration* ×  $V_E$  × *exposure duration* × *alveolar deposition efficiency* =

$$\text{nTSBs aerosol concentration} \times \left(10 \frac{\text{L}}{\text{min}}\right) \times \left(10^{-3} \frac{\text{m}^3}{\text{L}}\right) \times \left(8 \frac{\text{hr}}{\text{d}}\right) \times \left(60 \frac{\text{min}}{\text{h}}\right) \times 50\%$$

where  $V_E$  is the respiratory volume/min. The alveolar deposition efficiency of nTSBs was calculated according to International Commission on Radiological Protection Deposition Model. For nanoparticles, the alveolar deposition efficiency was assuming as 50%. The human daily nTSBs alveolar deposition dose was estimated as 412.21±51.48 (353.95-509.85) μg/day. In addition, 412.21 μg nTSBs per day deposition with a conservative estimate of human lung surface area (70 m<sup>2</sup>) would amount to 0.59 ng/cm<sup>2</sup> per day. Considering a 5-day workweek, 52 weeks a year, and the surface area (0.32 cm<sup>2</sup>) of a well in a 96-well plate, it would take 20 working years to reach the tested dose of 10 μg/mL nTSBs, assuming 100% deposition of the administered dose.

**Table S1. Element Composition of TSBs**

| Element | (N) %     | (C) %     | (H) %     | (O) %       | H/C  | O/C  | (N+O)/C |
|---------|-----------|-----------|-----------|-------------|------|------|---------|
| nTSBs   | 1.27±0.02 | 70.5±0.02 | 2.55±0.01 | 10.22±0.083 | 0.04 | 0.14 | 0.16    |

**Table S2. Metal Composition of TSBs**

| <b>Metal Concentration<br/>(µg/g)</b> | <b>nTSBs</b> |
|---------------------------------------|--------------|
| Mg                                    | 4571         |
| Al                                    | 1819         |
| K                                     | 43408        |
| Cr                                    | ND           |
| Co                                    | ND           |
| Ni                                    | ND           |
| Cu                                    | <52.36       |
| Zn                                    | <52.36       |
| As                                    | ND           |
| Cd                                    | ND           |
| Pb                                    | ND           |

**Table S3. Primer sequences for the qRT-PCR assays**

| <b>Primer</b> | <b>Sense</b>          | <b>Antisense</b>       |
|---------------|-----------------------|------------------------|
| GAPDH         | GAGTCAACGGATTTGGTCGT  | TTCATTTTGGAGGGATCTCG   |
| HO-1          | AACAAAGTGCAAGATTCTGCC | AGCTGAGTGTAAGGACCCATCG |

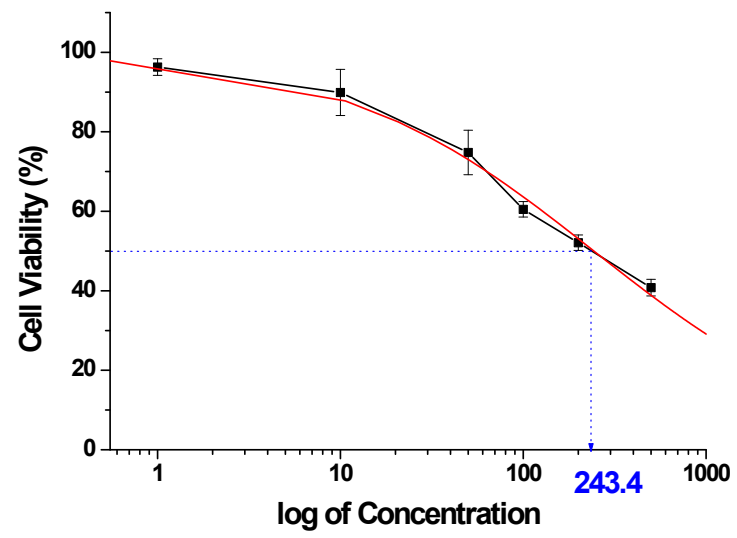

Fig. S1. The effective concentrations (EC<sub>50</sub>) value of nTSB.

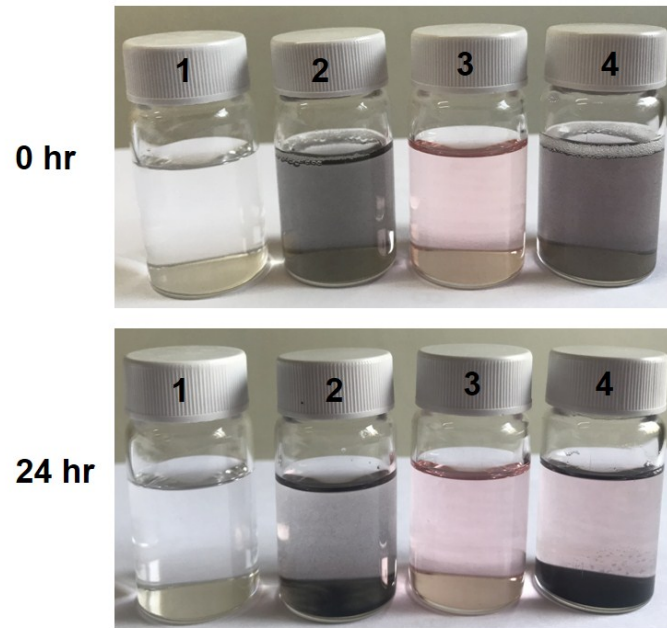

**Figure S2. Photographs of nTSBs dispersions in ddH<sub>2</sub>O and LHC-9 medium, respectively. 1. ddH<sub>2</sub>O; 2. nTSBs dispersed in ddH<sub>2</sub>O; 3. LHC-9 medium; 4. nTSBs dispersed in LHC-9 medium; Images marked '0 hr' show dispersions immediately after addition, while images marked '24 hr' is from dispersions after standing still for 1day, respectively.**

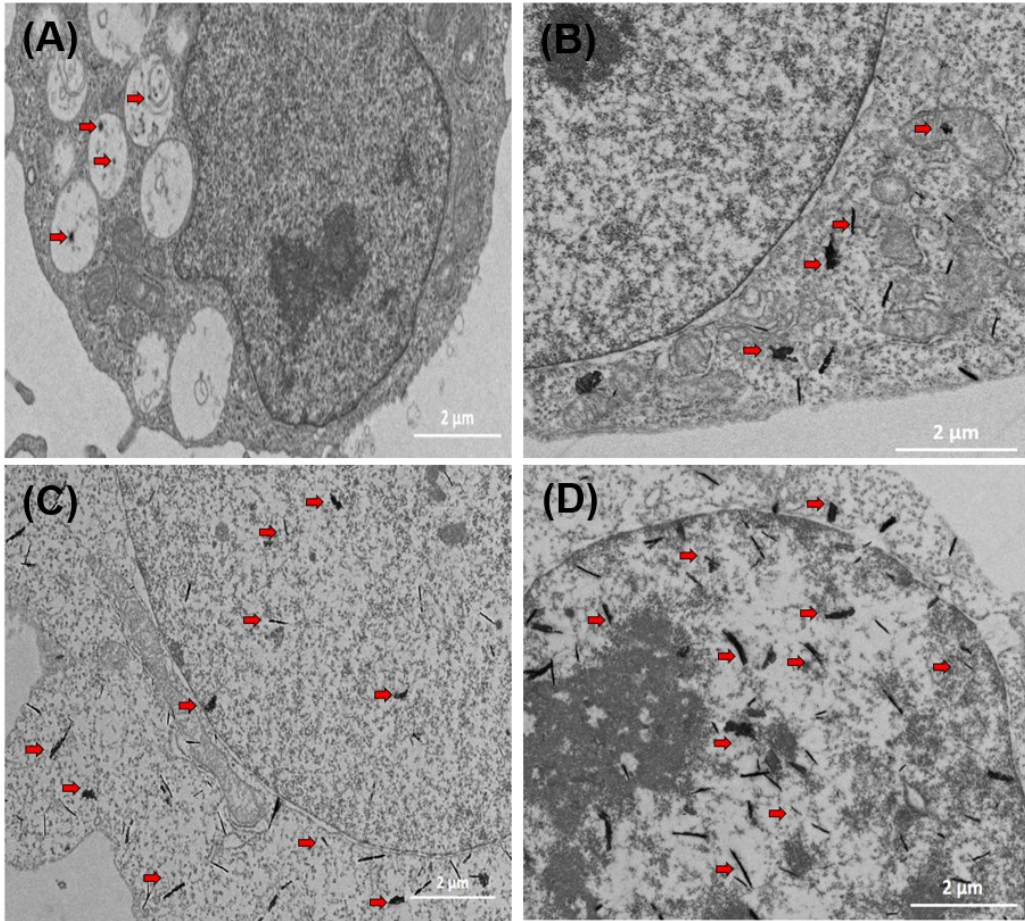

**Figure S3. Uptake of nTSBs by BEAS-2B cells.** Transmission electron microscopic (TEM) images of ultrathin sections of BEAS-2B cells treated with (A, B) 10 µg/mL nTSBs and (C, D) 100 µg/mL nTSBs. Red arrows denote nTSBs, scale bar: 2 µm.
